# Supplementary material for: Anti-Inflammatory and Antioxidant Properties of Tart Cherry Consumption in the Heart of Obese Rats
Source: MDPI journal article supplement (doi:10.3390/biology11050646), 2022-04-23
Supplement: s1 [file s1]

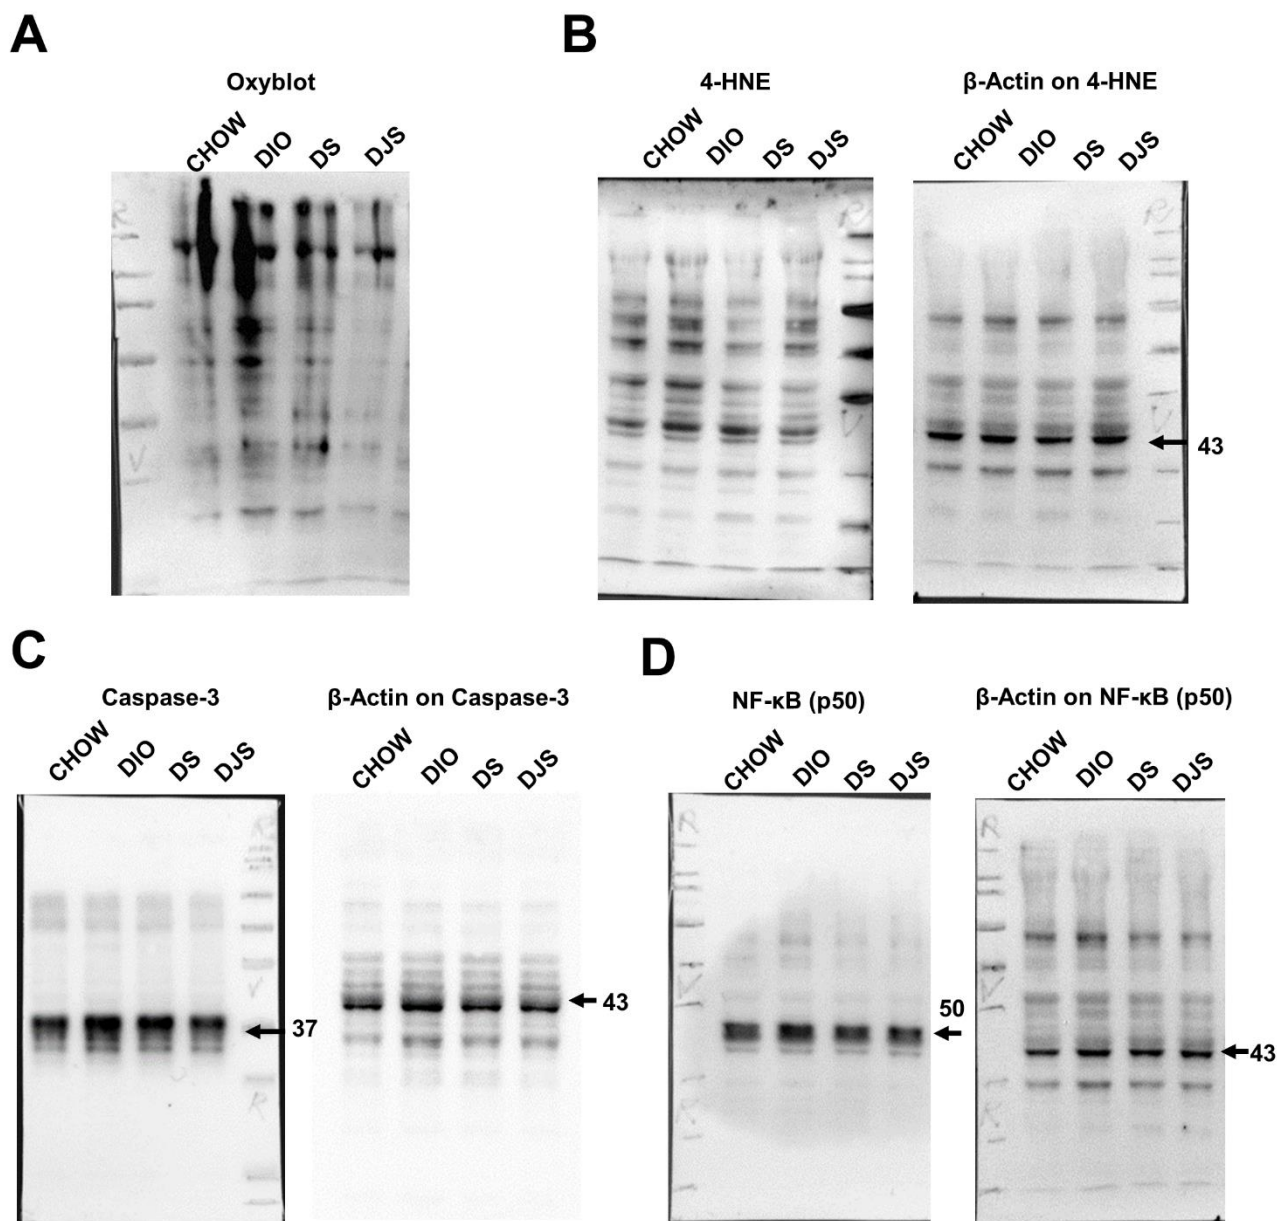

**Supplementary Figure S1.** Full-length WB images for figures 3 and 4: oxyblot (A), 4-Hydroxynonenal (4-HNE) (B), caspase-3 (C) and nuclear factor kappa-light-chain-enhancer of activated B cells subunit p50 (NF-κB p50) (D). All the WB were normalized to β-actin. Molecular weight of proteins in kilodaltons is indicated by the arrow at right. CHOW rats, fed with standard diet; DIO rats, fed with high-fat diet; DS, DIO rats supplemented with tart cherry seeds; DJS, DS rats supplemented with tart cherry juice.



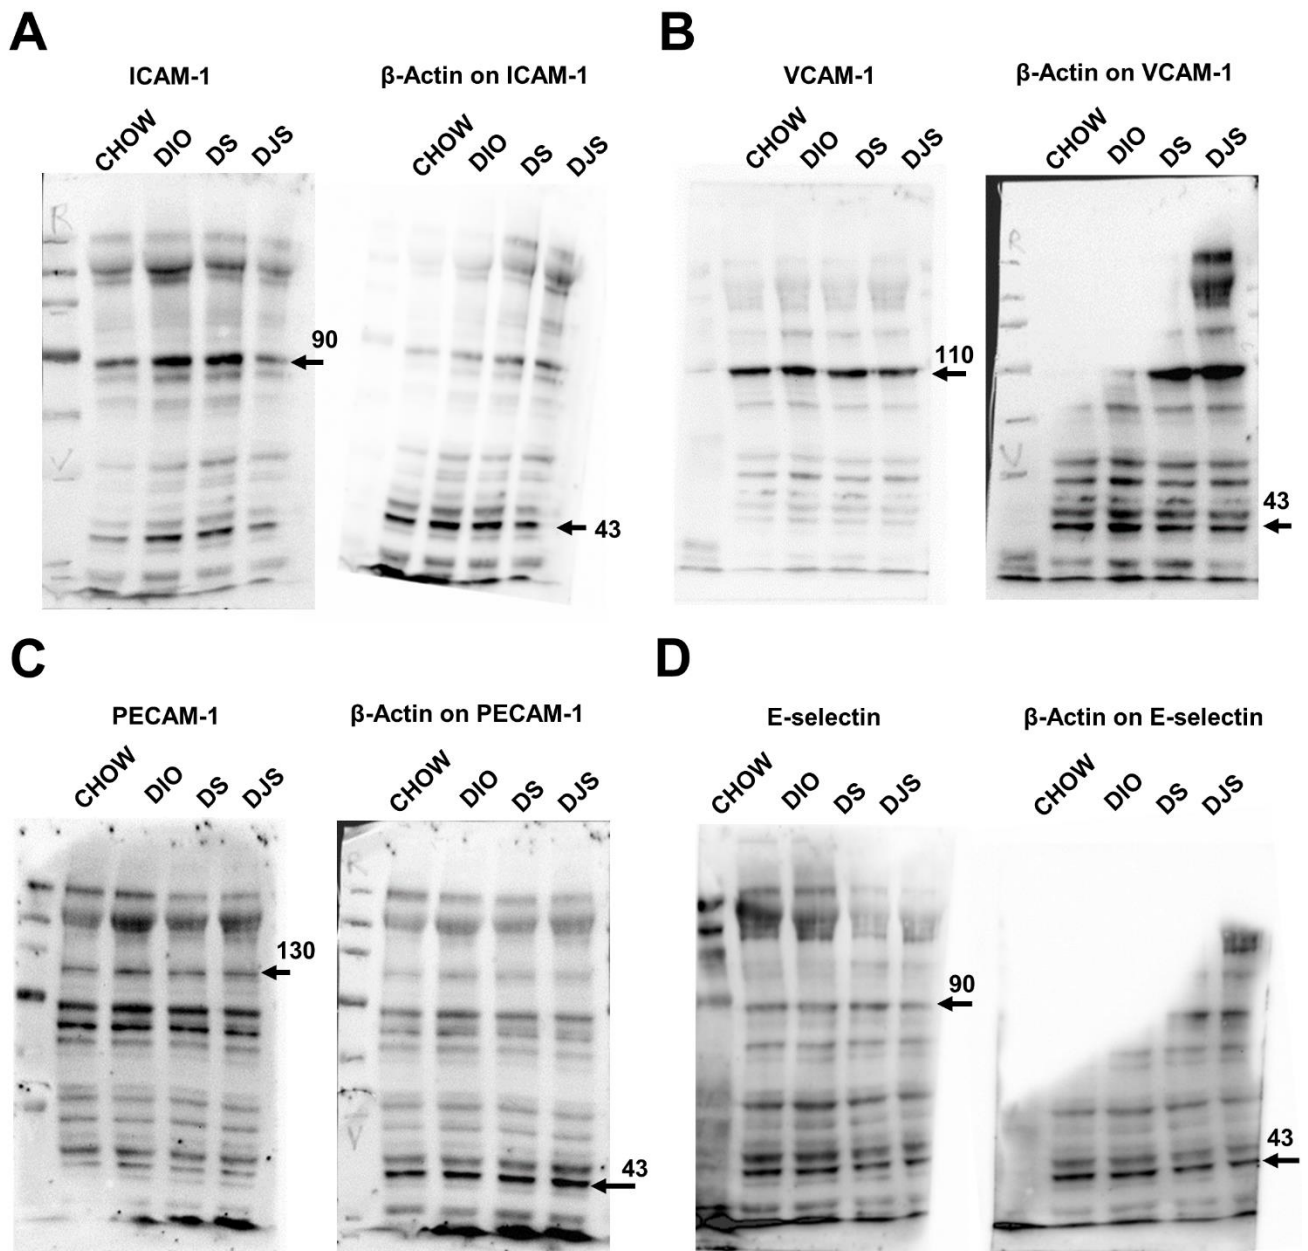

**Supplementary Figure S2.** Full-length WB images for figure 5: intracellular adhesion molecule-1 (ICAM-1) (A), vascular cell adhesion molecule-1 (VCAM-1) (B), platelet endothelial cell adhesion molecule-1 (PECAM-1) (C) and E-selectin (D). All the WB were normalized to  $\beta$ -actin. Molecular weight of proteins in kilodaltons is indicated by the arrow at right. CHOW rats, fed with standard diet; DIO rats, fed with high-fat diet; DS, DIO rats supplemented with tart cherry seeds; DJS, DS rats supplemented with tart cherry juice.



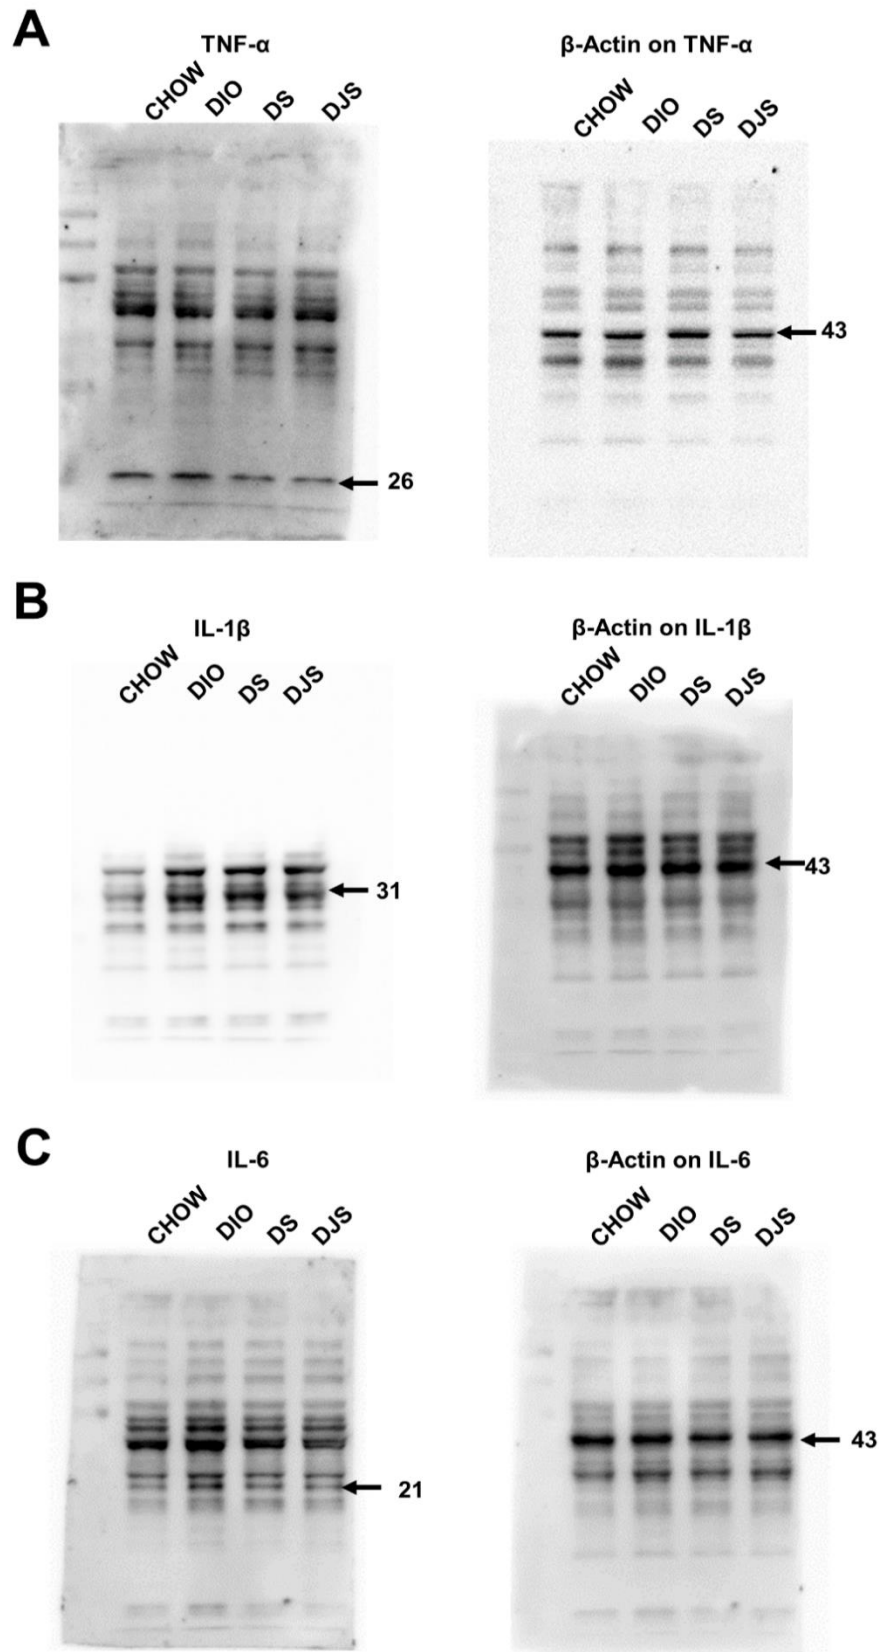

**Supplementary Figure S3.** Full-length WB images for figure 7: tumor necrosis factor- $\alpha$  (TNF- $\alpha$ ) (A), interleukin-1 $\beta$  (IL-1 $\beta$ ) (B) and interleukin-6 (IL-6) (C). All the WB were normalized to  $\beta$ -actin. Molecular weight of proteins in kilodaltons is indicated by the arrow at right. CHOW rats, fed with standard diet; DIO rats, fed with high-fat diet; DS, DIO rats supplemented with tart cherry seeds; DJS, DS rats supplemented with tart cherry juice.
